# Supplementary material for: Predictive performance of multi-model ensemble forecasts of COVID-19 across European nations
Source: bioRxiv or medRxiv preprint supplement (doi:10.1101/2022.06.16.22276024), 2022-06-16
Supplement: Supplementary file [file media-1.pdf]

# Supplement

Supplementary information: *Predictive performance of multi-model ensemble forecasts of COVID-19 across European nations*

## Participating teams

The following teams participated in the European Forecast Hub by contributing forecasts over the study period. Information below is taken from metadata provided by each team.

| Model                     | Affiliation                                                         | Methods                                                                                                                    | Metadata |
|---------------------------|---------------------------------------------------------------------|----------------------------------------------------------------------------------------------------------------------------|----------|
| BIOCOMSC-Gompertz         | BIOCOMSC                                                            | Empirical model based on cases and deaths dynamics.                                                                        | Metadata |
| CovidMetrics-epiBATS      | University of Cologne Covid Metrics                                 | Forecasts are based on TBATS - models (DeLivera, Hyndman and Snyder (2011)) and are updated daily for each German state.   | Metadata |
| epiforecasts-EpiNow2      | Epiforecasts / London School of Hygiene and Tropical Medicine       | Semi-mechanistic estimation of the time-varying reproduction number for latent infections mapped to reported cases/deaths. | Metadata |
| epiforecasts-weeklygrowth | epiforecasts                                                        | A Bayesian autoregressive model using weekly incidence data, application of the forecast.vocs R package.                   | Metadata |
| epiMOX-SUIHTER            | epiMOX                                                              | Compartmental model SUIHTER                                                                                                | Metadata |
| EuroCOVIDhub-ensemble     | European COVID-19 Forecast Hub                                      | An ensemble, or model average, of submitted forecasts to the European COVID-19 Forecast Hub.                               | Metadata |
| FIAS_FZJ-Epi1Ger          | Frankfurt Institute for Advanced Studies & Forschungszentrum Jülich | An extended SEIR model with additional compartments for undetected cases                                                   | Metadata |

| Model                      | Affiliation                                                      | Methods                                                                                                                                                                                                 | Metadata |
|----------------------------|------------------------------------------------------------------|---------------------------------------------------------------------------------------------------------------------------------------------------------------------------------------------------------|----------|
| HZI-AgeExtendedSEIR        | Helmholtz Zentrum fuer Infektionsforschung                       | Deterministic SEIR type model                                                                                                                                                                           | Metadata |
| ICM-agentModel             | ICM / University of Warsaw                                       | Agent-based model                                                                                                                                                                                       | Metadata |
| IEM_Health-CovidProject    | IEM Health                                                       | SEIR model projections for daily incident confirmed COVID cases and deaths by using AI to fit actual cases observed.                                                                                    | Metadata |
| ILM-EKF                    | ILM                                                              | Extended Kalman filter based on reproduction equation                                                                                                                                                   | Metadata |
| itwm-dSEIR                 | Fraunhofer Institute for Industrial Mathematics ITWM             | cohort based, integral equation                                                                                                                                                                         | Metadata |
| ITWW-county_repro          | ITWW                                                             | Forecasts of county level incidence based on regional reproduction numbers.                                                                                                                             | Metadata |
| JBUD-HMXK                  | JBUD                                                             | Heavily modified infection-age SIR-X model with waning immunity, vaccinations, seasonality and undetected cases.                                                                                        | Metadata |
| MOCOS-agent1               | MOCOS group                                                      | Agent-based microsimulation model                                                                                                                                                                       | Metadata |
| MUNI-ARIMA                 | Masaryk University                                               | ARIMA model with outlier detection fitted to transformed weekly aggregated series.                                                                                                                      | Metadata |
| MUNI_DMS-SEIAR             | Department of Mathematics and Statistics Masaryk University Team | SEIAR model with A compartment of absent unobserved infected estimated from hospital data with incorporated mobility data dependence; optimized to the compartment of all exposed (unobserved included) | Metadata |
| PL_GRedlarski-DistrictsSum | Grzegorz Redlarski                                               | Modified SIR method, applied to all districts. Forecasts for districts are summed up.                                                                                                                   | Metadata |

| Model                       | Affiliation                                              | Methods                                                                                                                                                                                               | Metadata |
|-----------------------------|----------------------------------------------------------|-------------------------------------------------------------------------------------------------------------------------------------------------------------------------------------------------------|----------|
| prolix-euclidean            | prolix                                                   | Offsets obtained by correlations, best linear approximation of reproduction rates (using vaccination approximation) by least euclidean distance, and linear prediction.                               | Metadata |
| RobertWalraven-ESG          | Robert Walraven                                          | Multiple skewed gaussian distribution peaks fit to raw data                                                                                                                                           | Metadata |
| SDSC_ISG-TrendModel         | Swiss Data Science Center / University of Geneva         | The Trend Model predicts daily cases and deaths using linear extrapolation on the linear or log scale of the underlying trend estimated by a robust LOESS seasonal-trend decomposition model.         | Metadata |
| Statgroup19-richards        | Statgroup19                                              | Richards' curve based generalized growth model                                                                                                                                                        | Metadata |
| Statgroup19-spatialrichards | Statgroup19                                              | Richards' curve based generalized growth model taking into account spatial dependence                                                                                                                 | Metadata |
| UC3M-EpiGraph               | Universidad Carlos III de Madrid                         | Agent-based parallel simulator that models individual interactions extracted from social networks and demographical data.                                                                             | Metadata |
| ULZF-SEIRC19SI              | University of Ljubljana, Faculty of Health Sciences Team | SEIHR model extended with compartments for hospitals, intensive care units, asymptomatic cases, separate submodels for vaccinated and unvaccinated, divided to 5 age subgroups of population          | Metadata |
| UMass-MechBayes             | UMass-Amherst                                            | Bayesian compartmental model with observations on cumulative case counts and cumulative deaths. Model is fit independently to each state. Model includes observation noise and a case detection rate. | Metadata |
| UppUmibUsi-MultiBayes       | UNIPG_UNIBS                                              | Bayesian hierarchical models for counts of patients in mutually exclusive and exhaustive categories such as hospitalized in regular wards and in intensive care units, deceased and recovered         | Metadata |

| Model         | Affiliation                                                  | Methods                                                                                                                                                                         | Metadata |
|---------------|--------------------------------------------------------------|---------------------------------------------------------------------------------------------------------------------------------------------------------------------------------|----------|
| USC-SIkJalpha | University of Southern California                            | A heterogeneous infection rate model with human mobility for epidemic modeling. Our model adapts to changing trends and provide predictions of confirmed cases and deaths.      | Metadata |
| UVA-Ensemble  | University of Virginia, Biocomplexity COVID-19 Response Team | An ensemble of multiple methods such as auto-regressive (AR) models with exogenous variables, Long short-term memory (LSTM) models, Kalman filter and PatchSim (an SEIR model). | Metadata |

## Summary of evaluated forecasts

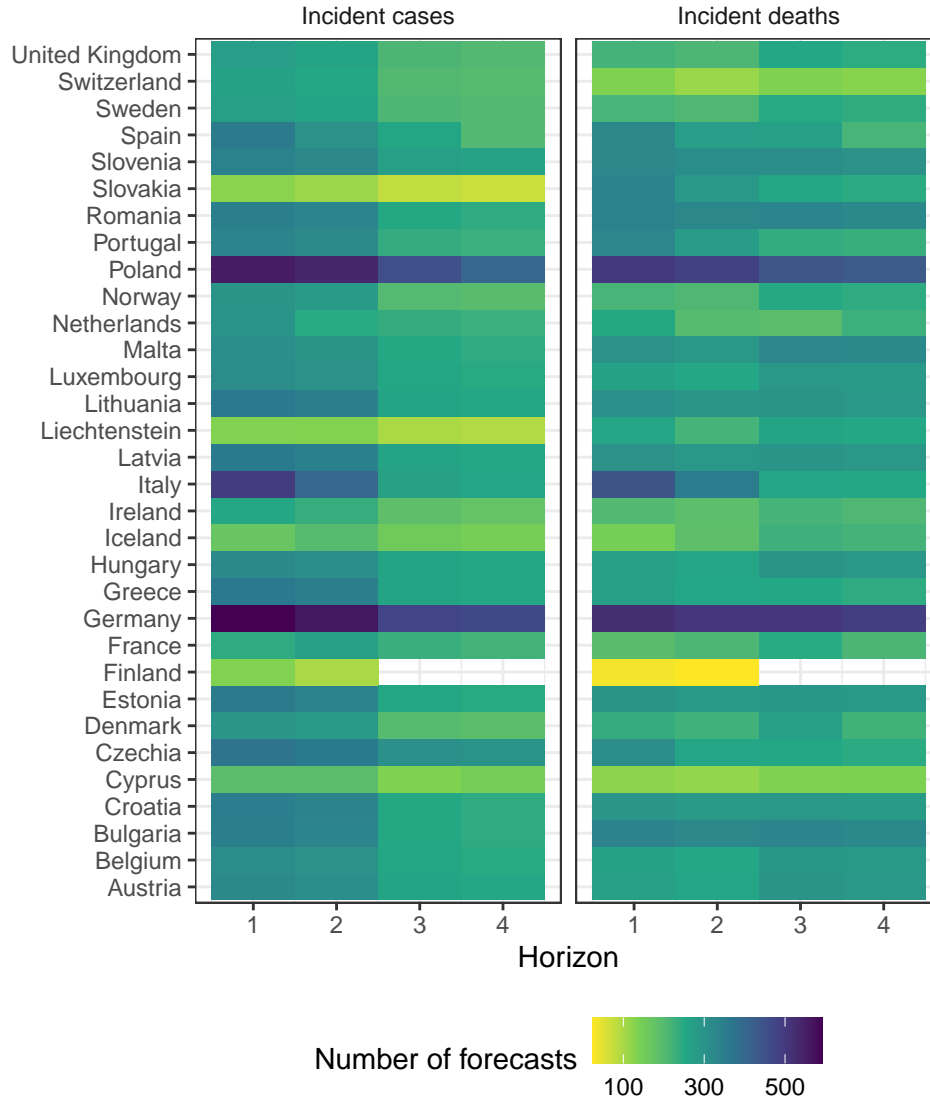

Figure 1: Total number of forecasts included in evaluation, by target location, week ahead horizon, and variable

## Comparison of contributed forecasts and the Hub ensemble

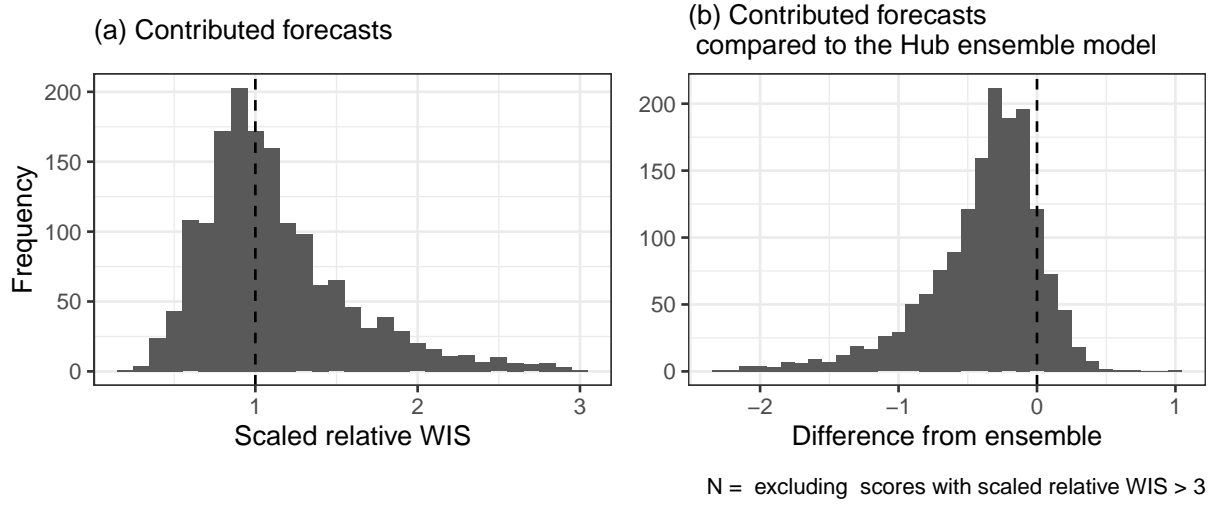

Figure 2: Comparison of scores between participating model forecasts and Hub ensemble of all available forecasts for each target
